# Supplementary material for: Digital health at the age of the Anthropocene
Source: PubMed Central journal article supplement — Lancet Digit Health. Author manuscript; Available in PMC 2021 Mar 3. (PMC7928047; doi:10.1016/s2589-7500(20)30130-8), 2020-06
Supplement: NIHMS1667502-supplement-Supplementary_Material.pdf [file NIHMS1667502-supplement-Supplementary_Material.pdf]

# THE LANCET

## Digital Health

### **Supplementary appendix**

This appendix formed part of the original submission and has been peer reviewed.  
We post it as supplied by the authors.

Supplement to: Chevance G, Hekler EB, Efoui-Hess M. Digital health at the age of the Anthropocene. *Lancet Digital Health* 2020; **2**: e290–91.

**Supplemental material for “Digital health at the age of the Anthropocene” authored by Guillaume Chevance et al., 2020.**

Electricity consumption of ICT:

- Andrae ASG, Edler T. On Global Electricity Usage of Communication Technology: Trends to 2030. *Challenges*. 2015;6(1):117-157. doi:10.3390/challe6010117

Growth in wearables, IoT and health app market:

- Statista. Total wearable device unit shipments worldwide 2014-2023. 2019. <https://www.statista.com/statistics/437871/wearables-worldwide-shipments/>. Accessed March 9, 2020.
- Statista. Apps worldwide. 2019. <https://www.statista.com/outlook/318/100/apps/worldwide>. Accessed March 9, 2020.
- Grand View Research. Internet of Things (IoT) in Healthcare. 2019. <https://www.grandviewresearch.com/industry-analysis/internet-of-things-iot-healthcare-market>. Accessed March 9, 2020.

Lifecycle of electronics:

- Green electronics council. Lifecycle Management of Electronics from Procurement to Disposal: Sustainability Roadmap for Hospitals. 2015. <http://www.sustainabilityroadmap.org/pims/pdfs/pim16-healthcare-electronics.pdf>. Accessed March 9, 2020.
- IPEN: A toxics-free future. Weak controls: European e-waste poison africa's food chain. [https://ipen.org/sites/default/files/documents/final\\_ghana-egg-report-v1\\_6-web\\_copy.pdf](https://ipen.org/sites/default/files/documents/final_ghana-egg-report-v1_6-web_copy.pdf). Published April 2019. Accessed November 27, 2019.
- Patrignani N, Whitehouse D. Slow Tech and ICT: A responsible, Sustainable and Ethical Approach. Palgrave Macmillan Editions. doi: <https://doi.org/10.1007/978-3-319-68944-9>

Attitudes toward technology:

- Huesemann MH. Can pollution problems be effectively solved by environmental science and technology? An analysis of critical limitations. *Ecol Econ*. 2001;37(2):271-287. doi:10.1016/S0921-8009(00)00283-4
- Kerschner C, Ehlers MH. A framework of attitudes technology in theory and practice. *Ecol Econ*. 2016;126:139-151. doi: <http://dx.doi.org/10.1016/j.ecolecon.2016.02.010>

Rebound effect:

- Herring H, Roy R. Sustainable services, electronic education and the rebound effect. *Environ Impact Assess Rev*. 2002;22(5):525-542. doi:10.1016/S0195-9255(02)00026-4
- Freeman R. A Theory on the Future of the Rebound Effect in a Resource-Constrained World. *Frontiers in Energy Research*. 2018;6, doi:10.3389/fenrg.2018.00081.

#### Decision Making Checklist:

- Nebeker, et al. Development of a Decision-Making Checklist Tool to Support Technology Selection in Digital Health Research. *Translational Behavioral Medicine*, 2019, doi:10.1093/tbm/ibz074.

#### Design and methodology to minimize cost and resources:

- Blackston, J., Chapple, A., Mcgree, J., Mcdonald, S., & Nikles, J. Comparison of Aggregated N-of-1 Trials with Parallel and Crossover Randomized Controlled Trials Using Simulation Studies. *Healthcare*. 2019;7(4), 137. doi: 10.3390/healthcare7040137

#### Health and Anthropocene:

- Zywert, K. Health and Anthropocene: Human health and social-ecological systems change: Rethinking health in the Anthropocene. *The Anthropocene Review*. 2017; 4(3), 216-238.
